# Supplementary figures and images for: Hydrogel Delivery of Mesenchymal Stem Cell–Expressing Bone Morphogenetic Protein-2 Enhances Bone Defect Repair
Source: PubMed Central journal article supplement — Plast Reconstr Surg Glob Open. 2016 Aug 12;4(8):e838. doi: 10.1097/GOX.0000000000000817 (PMC5010329; doi:10.1097/gox.0000000000000817), 2016-08-12

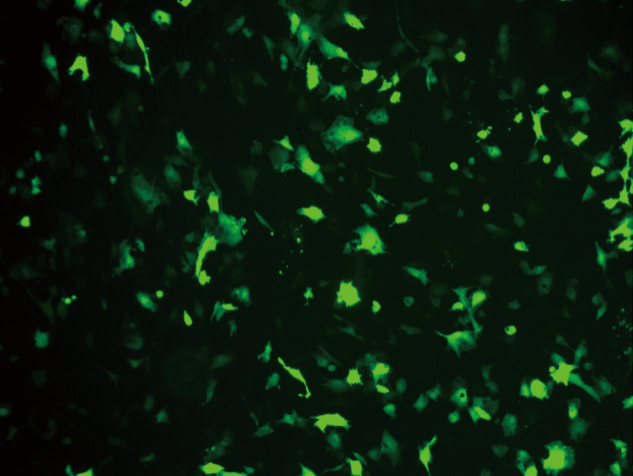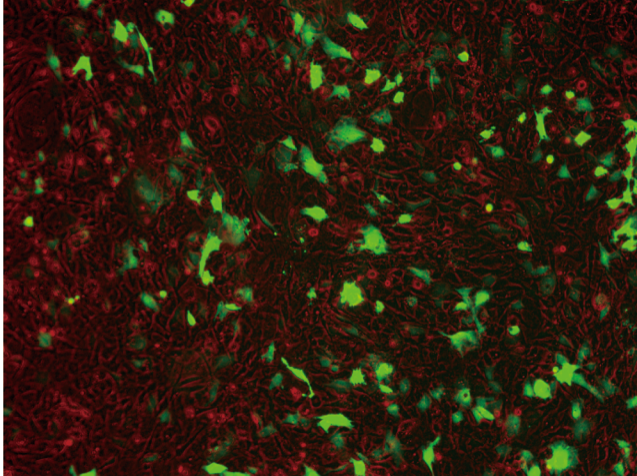

Supplement: gox-4-0e838-s001.pdf [file gox-4-0e838-s001.pdf]

**Control****S****S+C****S+C+ CDM****Defect Region**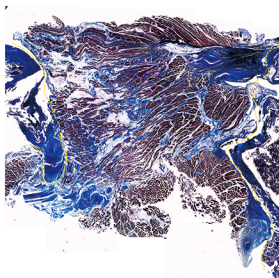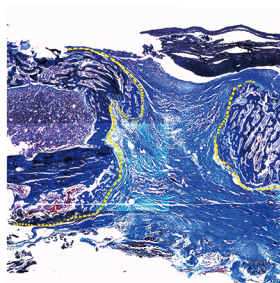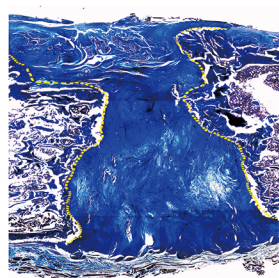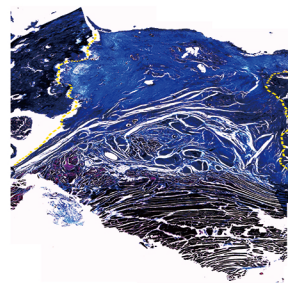**Border**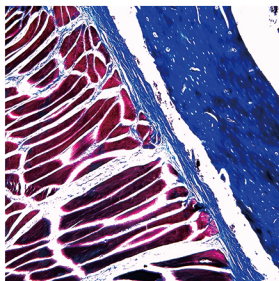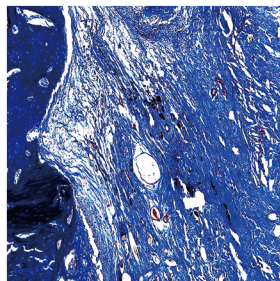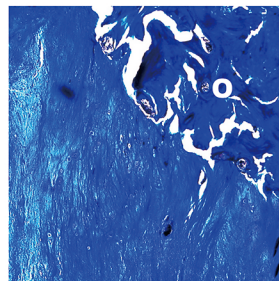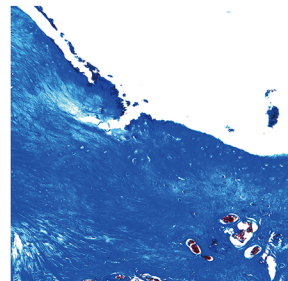**Center**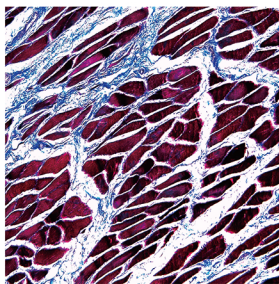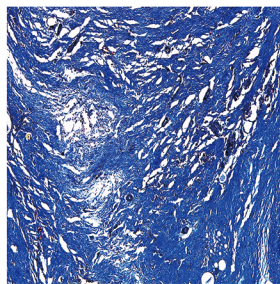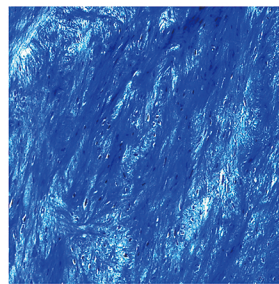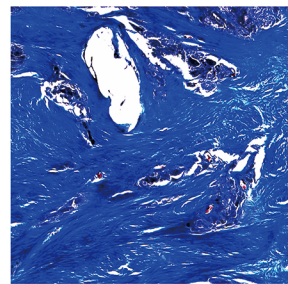

Supplement: gox-4-0e838-s002.pdf [file gox-4-0e838-s002.pdf]
